# Supplementary material for: Impact of a Procalcitonin-Based Protocol on Antibiotic Exposure and Costs in Critically Ill Patients
Source: PubMed Central journal article supplement — Crit Care Explor. 2021 Nov 9;3(11):e0571. doi: 10.1097/CCE.0000000000000571 (PMC8580196; doi:10.1097/cce.0000000000000571), 2021-11-09
Supplement: cc9-3-e0571-s002.pdf [file cc9-3-e0571-s002.pdf]

**Supplemental Table.** The association of procalcitonin test (PCT) availability for physician ordering in the medical intensive care unit (ICU) of a tertiary health system on days of antibiotics used and hospital length of stay (N=1,793).

| Encounter characteristics                                                                                                                                                                                                                                       | Days of antibiotics used<br>Coefficient<br>(95% CI) | Hospital length of stay<br>Coefficient<br>(95% CI) |
|-----------------------------------------------------------------------------------------------------------------------------------------------------------------------------------------------------------------------------------------------------------------|-----------------------------------------------------|----------------------------------------------------|
| <b>PCT adoption, pre</b>                                                                                                                                                                                                                                        | REF                                                 | REF                                                |
| <b>Post</b>                                                                                                                                                                                                                                                     | <b>-0.58**</b><br>(-0.99 – -0.17)                   | <b>0.64*</b><br>(0.12 – 1.15)                      |
| Days of antibiotic used                                                                                                                                                                                                                                         |                                                     | 0.84**<br>(0.78 – 0.90)                            |
| Gender, male                                                                                                                                                                                                                                                    | REF                                                 | REF                                                |
| Female                                                                                                                                                                                                                                                          | -0.64**<br>(-1.05 – -0.23)                          | -0.33<br>(-0.83 – 0.18)                            |
| Race, White                                                                                                                                                                                                                                                     | REF                                                 | REF                                                |
| Black                                                                                                                                                                                                                                                           | 0.42<br>(-0.06 – 0.89)                              | -0.64*<br>(-1.20 – -0.08)                          |
| Asian or other                                                                                                                                                                                                                                                  | -0.10<br>(-0.79 – 0.58)                             | -0.52<br>(-1.62 – 0.58)                            |
| Ethnicity, Hispanic                                                                                                                                                                                                                                             | REF                                                 | REF                                                |
| Non-Hispanic                                                                                                                                                                                                                                                    | -0.30<br>(-0.95 – 0.35)                             | -0.22<br>(-1.44 – 0.99)                            |
| Age                                                                                                                                                                                                                                                             | -0.01<br>(-0.02 – 0.01)                             | -0.01<br>(-0.02 – 0.02)                            |
| Insurance, Medicaid or other government                                                                                                                                                                                                                         | REF                                                 | REF                                                |
| Medicare                                                                                                                                                                                                                                                        | 0.92**<br>(0.29 – 1.55)                             | -0.34<br>(-1.07 – 0.40)                            |
| Private                                                                                                                                                                                                                                                         | 0.60*<br>(0.01 – 1.20)                              | 0.57<br>(-0.27 – 1.42)                             |
| Self-pay or Uninsured                                                                                                                                                                                                                                           | 0.18<br>(-1.00 – 1.36)                              | -0.01<br>(-1.60 – 1.59)                            |
| Hospital length of stay                                                                                                                                                                                                                                         | 0.43**<br>(0.38 – 0.47)                             |                                                    |
| ICU stay                                                                                                                                                                                                                                                        | 0.17**<br>(0.06 – 0.28)                             | 0.28**<br>(0.16 – 0.39)                            |
| Number of Elixhauser Comorbidities                                                                                                                                                                                                                              | 0.10*<br>(0.01 – 0.19)                              | 0.27**<br>(0.15 – 0.39)                            |
| Days on dialysis or renal replacement therapy                                                                                                                                                                                                                   | -0.12**<br>(-0.20 – -0.04)                          | 0.54**<br>(0.26 – 0.83)                            |
| Days on mechanical ventilation                                                                                                                                                                                                                                  | 0.09<br>(-0.00 – 0.19)                              | 0.22**<br>(0.14 – 0.29)                            |
| Discharge disposition, Home                                                                                                                                                                                                                                     |                                                     | REF                                                |
| Facility                                                                                                                                                                                                                                                        |                                                     | 0.41<br>(-0.38 – 1.19)                             |
| Expired (in-hospital)                                                                                                                                                                                                                                           |                                                     | -3.14**<br>(-3.72 – -2.57)                         |
| REF, reference category; CI, confidence interval. Regression analysis adjusted for variables listed in table and clustered by patient level. Missing values for demographic characteristics were analyzed as a separate missing category. *p<0.05 and **p<0.01. |                                                     |                                                    |
