# Supplementary figures and images for: Impact of a Procalcitonin-Based Protocol on Antibiotic Exposure and Costs in Critically Ill Patients
Source: PubMed Central journal article supplement — Crit Care Explor. 2021 Nov 9;3(11):e0571. doi: 10.1097/CCE.0000000000000571 (PMC8580196; doi:10.1097/cce.0000000000000571), 2021-11-09

## Supplemental Figure

### PCT Use in Suspected Sepsis

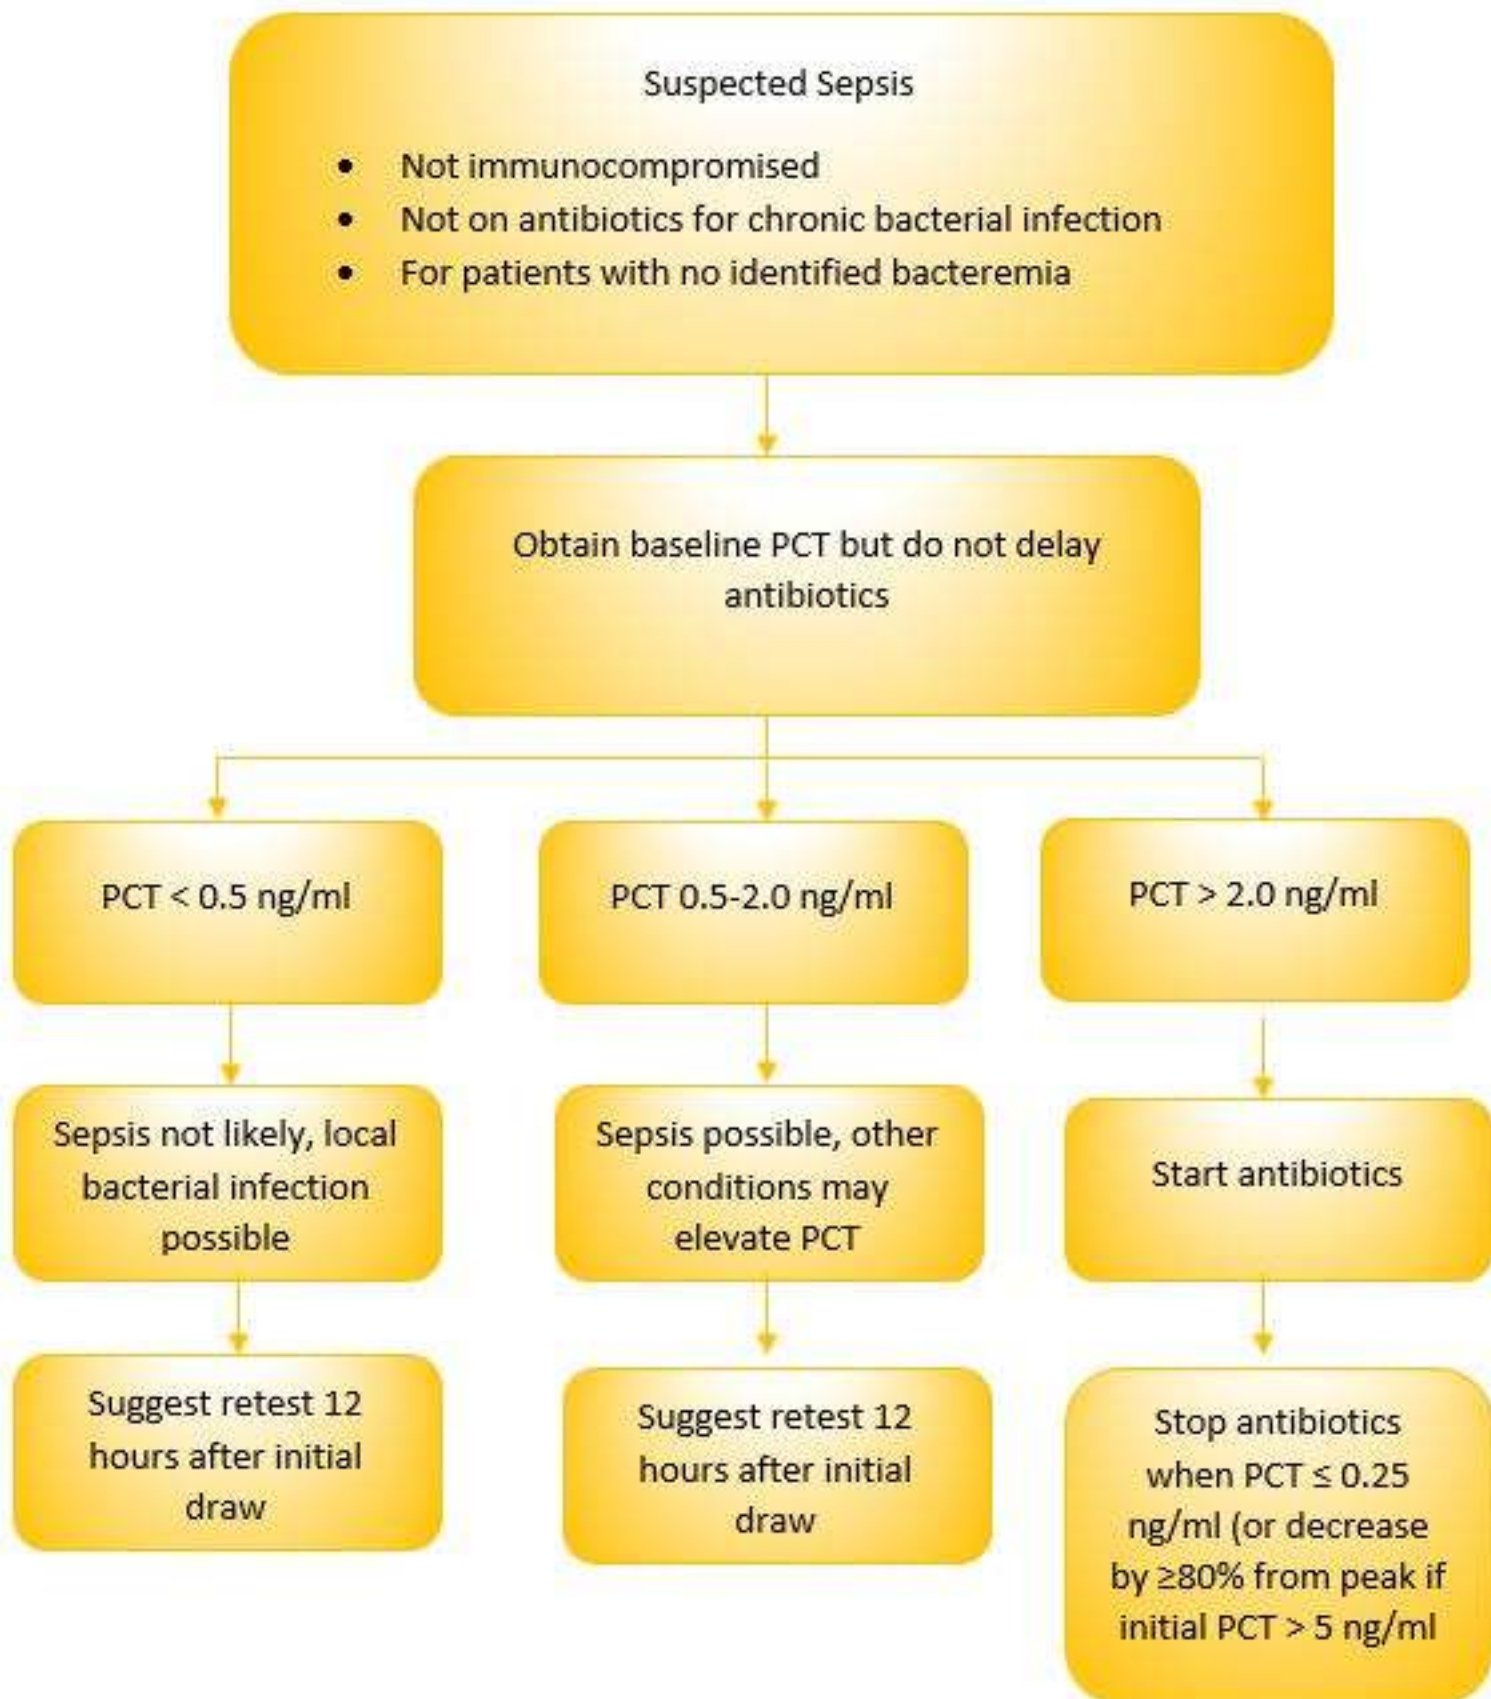

Supplement: cc9-3-e0571-s001.pdf [file cc9-3-e0571-s001.pdf]
